# Supplementary material
Source: MDPI journal article supplement (https://www.mdpi.com/2297-8739/11/2/60)
Supplement: s1 [file s1]

**Table S1.** Gradient for 5-CQA determination

| Time (min) | Eluent A (%) | Eluent B (%) | Flow rate (ml/min) |
|------------|--------------|--------------|--------------------|
| 0          | 100          | 0            | 1,0                |
| 4          | 85           | 15           | 1,0                |
| 20         | 60           | 40           | 1,0                |
| 40         | 45           | 55           | 1,0                |

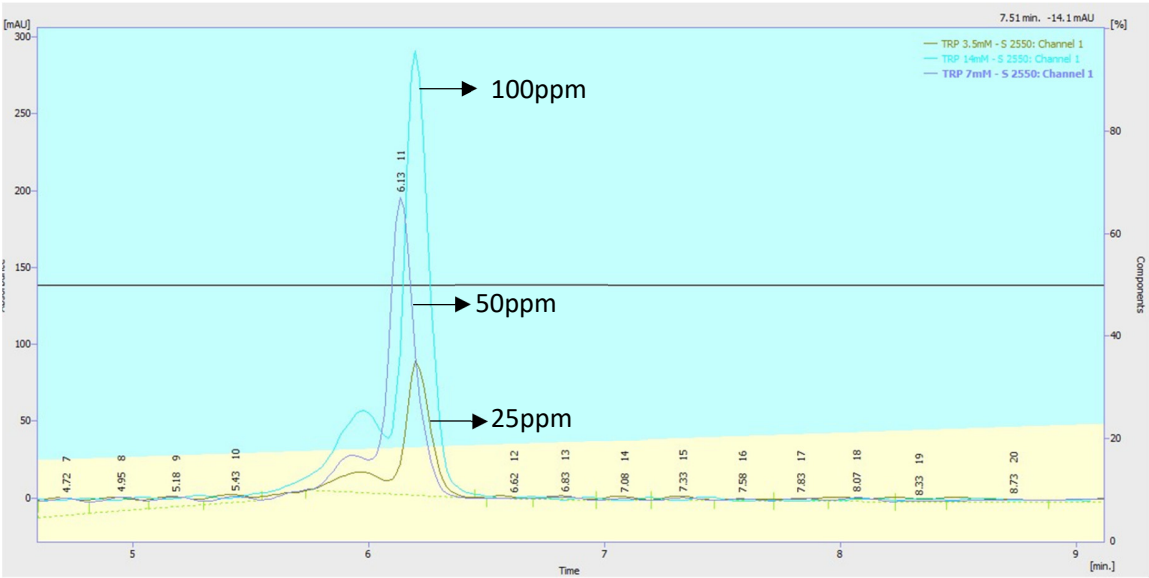

**Figure S1:** Comparative chromatogram of TRP at different concentrations

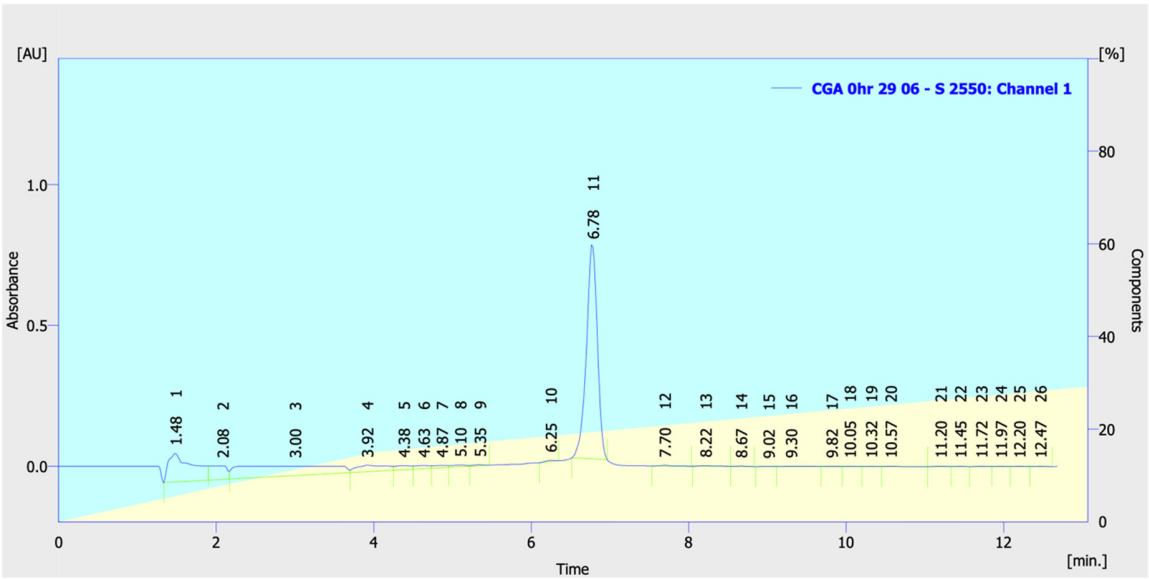

**Figure S2:** 5-CQA chromatogram

**Table S2:** Initial Rate Method results

| [A] (mM) | [B] (mM) | r (M min <sup>-1</sup> ) |
|----------|----------|--------------------------|
| 1        | 7        | 1,34x10 <sup>-5</sup>    |
| 0,5      | 7        | 2,43x10 <sup>-6</sup>    |
| 1        | 14       | 1,06 x10 <sup>-5</sup>   |

\*A= 5-CQA B=TRP

**Table S3:** Rate constant calculation

| t (min) | [C <sub>A</sub> ] (M)  | k (min <sup>-1</sup> )<br>n=1 | k (M <sup>-1</sup> min <sup>-1</sup> )<br>n=2 |
|---------|------------------------|-------------------------------|-----------------------------------------------|
| 70      | 6,15 x10 <sup>-5</sup> | 0,0398                        | 217,71                                        |
| 130     | 2,31 x10 <sup>-5</sup> | 0,0289                        | 324,45                                        |
| 165     | 1,59 x10 <sup>-5</sup> | 0,0255                        | 401,49                                        |
| 255     | 1,25 x10 <sup>-5</sup> | 0,0171                        | 303,60                                        |
| 315     | 9,46 x10 <sup>-6</sup> | 0,0148                        | 332,421                                       |
| 390     | 8,09 x10 <sup>-6</sup> | 0,0123                        | 314,41                                        |
| Average |                        | -                             | 315.68                                        |

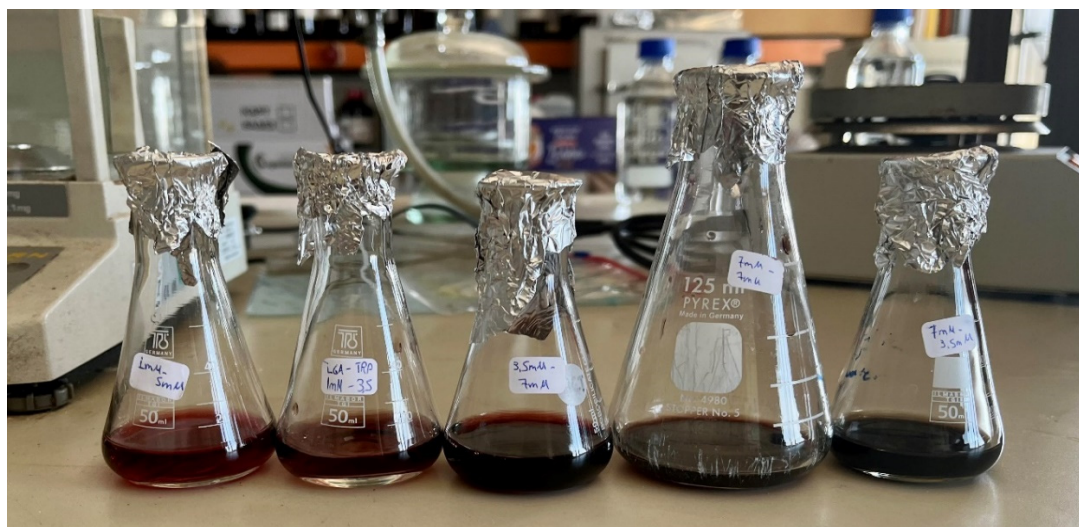

**Figure S3.** Color development of different molar ratios: from left to right: 5-CQA:TRP 1mM-5mM, 1mM-3,5mM, 3,5mM-7mM, 7mM-7mM and 7mM-3,5mM

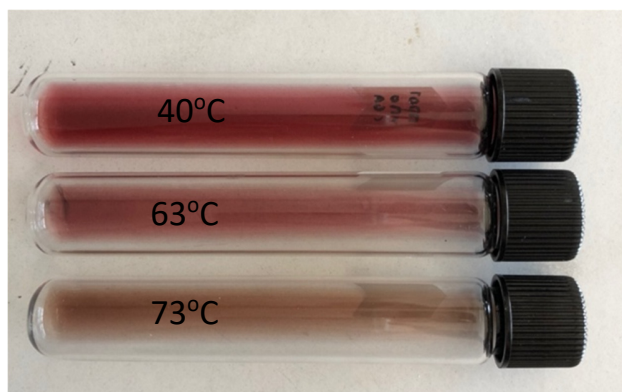

**Figure S4.** Color of the product pigment at different reaction temperatures

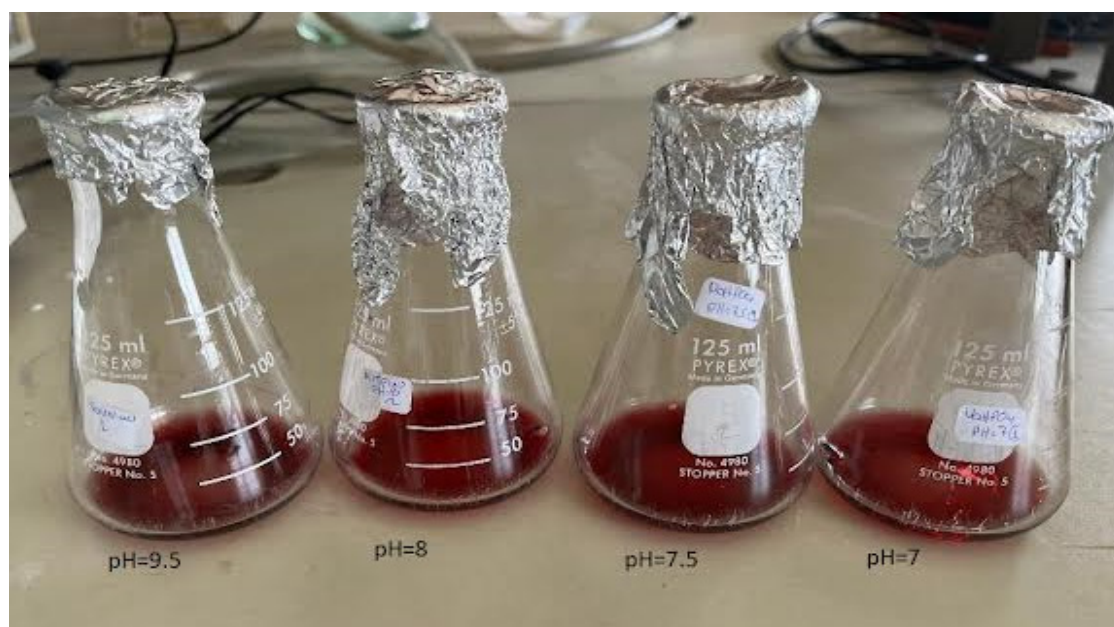

**Figure S5.** Color of samples at the end of each reaction at different pH (7, 7.5, 8 and 9.5)

**Table S4:** Color determination of final product after completion of the reaction at each different pH.

| <b>pH</b> | <b>L*</b> | <b>a*</b> | <b>b*</b> | <b><math>\Delta E</math></b> |
|-----------|-----------|-----------|-----------|------------------------------|
| 9.5       | 22.63     | 46.26     | 30.44     | -                            |
| 6.5       | 30.64     | 58.64     | 40.22     | 17.68                        |
| 7         | 31.50     | 56.66     | 41.84     | 17.79                        |
| 8         | 25.69     | 54.73     | 36.40     | 10.80                        |
| 9         | 23.42     | 48.34     | 32.65     | 3.13                         |

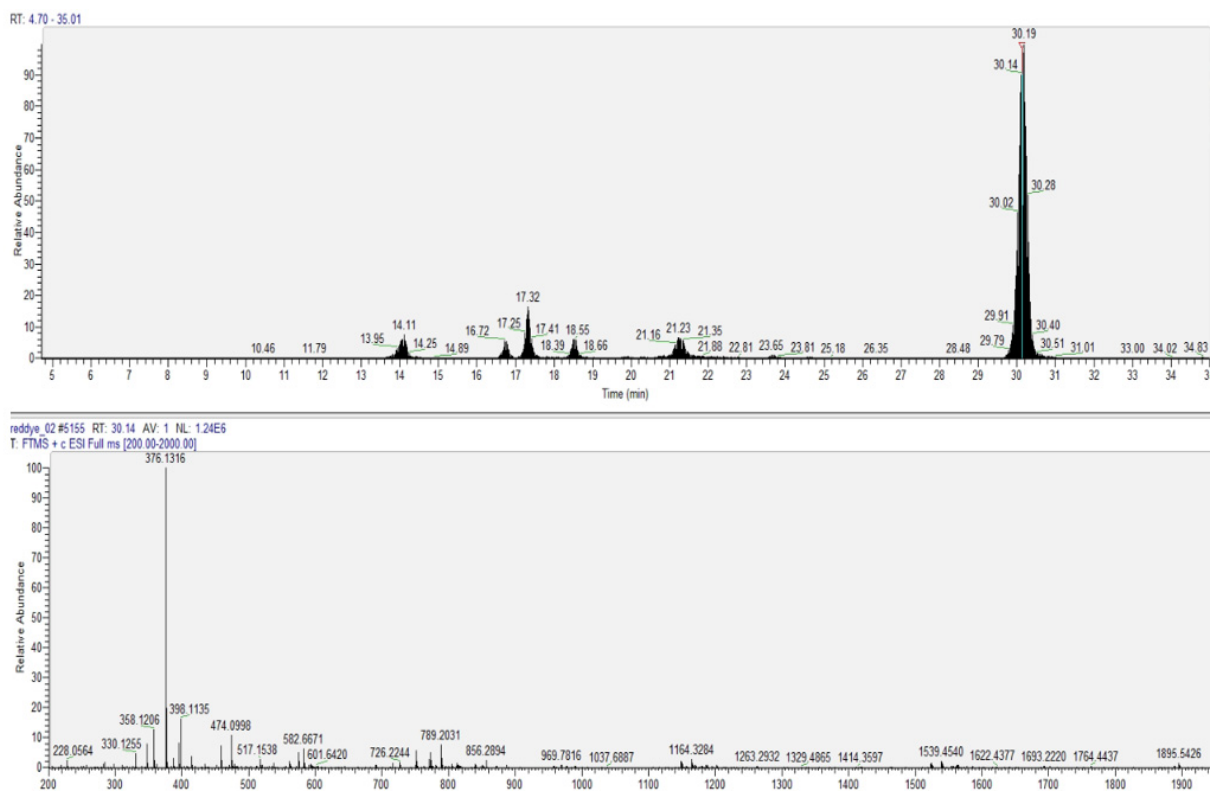

**Figure S6.** Spectrum of the red pigment solution at 30min

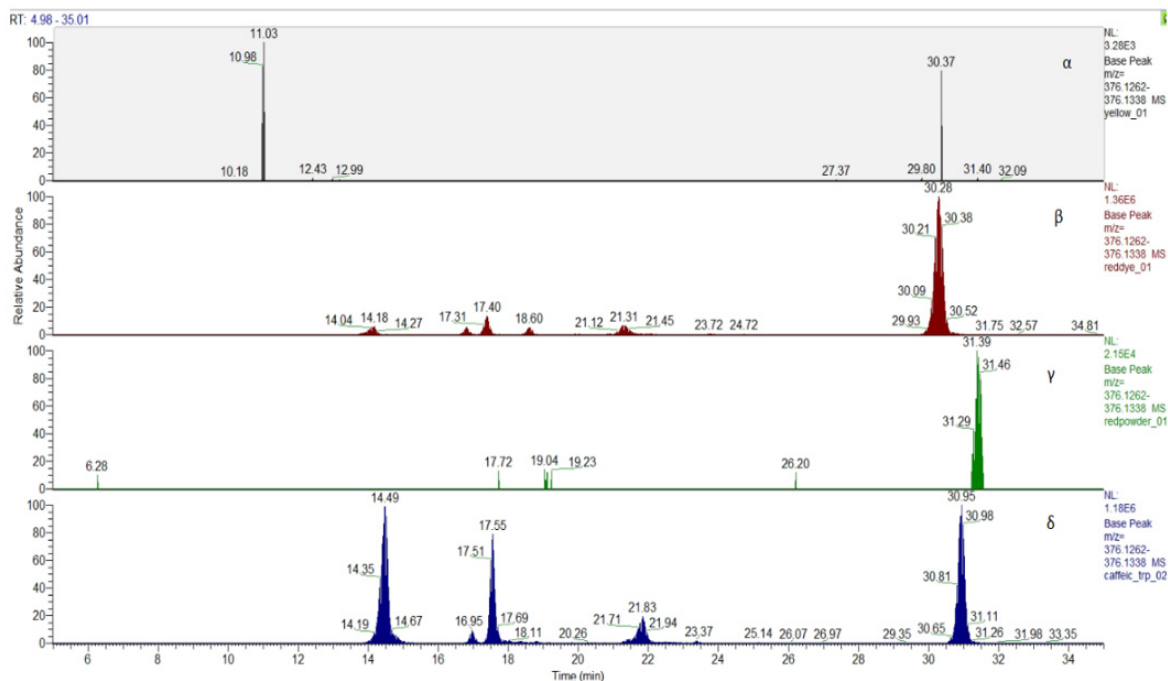

**Figure S7.** Peak 376,13m/z in the spectra of: a) t=15min of the reaction of CGA-TRP, b) Final product of the reaction, c) Spray dried powder, d) Final reaction of caffeic acid-TRP

An LTQ Orbitrap Discovery equipped with a Eurospher II 100-5 C18P column was used for the MS analysis. LC conditions were as follows:

1. Mobile phase A: 0.2M CH<sub>3</sub>COOH
2. Mobile phase B: ACN
3. Mobile phase C: MeOH

| <b><i>Time ( min)</i></b> | Mobile phase<br>A (%) | Mobile phase<br>B (%) | Mobile phase<br>C (%) | <b><i>Flow<br/>(mL/min)</i></b> |
|---------------------------|-----------------------|-----------------------|-----------------------|---------------------------------|
| 0                         | 100                   | 0                     | 0                     | 0.5                             |
| 11                        | 85                    | 15                    | 0                     | 0.5                             |
| 56                        | 60                    | 40                    | 0                     | 0.5                             |
| 70                        | 0                     | 0                     | 100                   | 0.5                             |

MS analysis conditions:

| <b>Parameter</b>                   | <b>Value</b> |
|------------------------------------|--------------|
| <b>Source Voltage</b>              | 3kV          |
| <b>Seath gas flow</b>              | 60arb        |
| <b>Auxiliary gas flow</b>          | 8arb         |
| <b>Sweep gas flow</b>              | 1arb         |
| <b>Capillary Temperature</b>       | 350°C        |
| <b>Capillary Voltage</b>           | 25V          |
| <b>Multipole 00 offset</b>         | 5V           |
| <b>Multipole 0 offset</b>          | 8V           |
| <b>Front lens</b>                  | 6.25V        |
| <b>Normalized collision energy</b> | 35%          |
